# Supplementary material for: Molecular Characterization of the Dwarf53 Gene Homolog in Dasypyrum Villosum
Source: MDPI journal article supplement (doi:10.3390/plants9020186), 2020-02-03
Supplement: s1 [file s1]

**Table S1.** The Chinese Spring wheat lines carrying alien genetic material from *D. villosum* used for mapping of the *D53* gene.

| Line    | Rearrangement type <sup>1</sup> | Chromosome | Source <sup>2</sup> | Marker amplification <sup>3</sup> |
|---------|---------------------------------|------------|---------------------|-----------------------------------|
| 7677    | A                               | 1V#3       | KSU                 | -                                 |
| 7679    | A                               | 3V#3       | KSU                 | -                                 |
| 7680    | A                               | 4V#3       | KSU                 | -                                 |
| 7681    | A                               | 5V#3       | KSU                 | ++                                |
| 7682    | A                               | 6V#3       | KSU                 | -                                 |
| 7683    | A                               | 7V#3       | KSU                 | -                                 |
| 7510    | A                               | 2V#1       | KSU                 | -                                 |
| 7511    | A                               | 4V#1       | KSU                 | -                                 |
| 7513    | A                               | 6V#1       | KSU                 | -                                 |
| 7514    | A                               | 7V#1       | KSU                 | -                                 |
| 3891/89 | S                               | 1V(1A)     | AJL                 | -                                 |
| 3896/89 | S                               | 1V(1D)     | AJL                 | -                                 |
| 86/11   | S                               | 3V(3B)     | AJL                 | -                                 |
| 1360/07 | S                               | 3V(3D)     | AJL                 | -                                 |
| 2333/89 | S                               | 5V(5D)     | AJL                 | ++                                |
| 2490/92 | S                               | 5V(5D)     | AJL                 | ++                                |
| 1411/94 | S                               | 6V(6B)     | AJL                 | -                                 |
| 1415/94 | S                               | 6V(6A)     | AJL                 | -                                 |
| 3889/89 | S                               | 7V(7A)     | AJL                 | -                                 |
| 6661    | S                               | 6V#2(6A)   | KSU                 | -                                 |
| 5585    | T                               | T6AL·6V#2S | KSU                 | -                                 |
| 5594    | T                               | T4DS·4V#3L | KSU                 | -                                 |
| 5615    | T                               | T1DS·1V#3L | KSU                 | -                                 |
| 5616    | T                               | T1DL·1V#3S | KSU                 | -                                 |
| 5634    | T                               | T2BS·2V#3L | KSU                 | -                                 |
| 5636    | T                               | T3DL·3V#3S | KSU                 | -                                 |
| 5637    | T                               | T3DS·3V#3L | KSU                 | -                                 |
| 5638    | T                               | T5DL·5V#3S | KSU                 | -                                 |
| 5639    | T                               | T7DL·7V#3S | KSU                 | -                                 |
| 5640    | T                               | T7DS·7V#3L | KSU                 | -                                 |
| 1438/94 | T                               | 6BS·6VL    | AJL                 | -                                 |
| 3214/96 | T                               | 6AS·6VL    | AJL                 | -                                 |
| 853/11  | T                               | 3V·3BL+3B  | AJL                 | -                                 |

<sup>1</sup> Rearrangement type: A – addition, S – substitution, T – translocation. <sup>2</sup> Source: KSU - Kansas State University; AJL - A. J. Lukaszewski, personal communication. <sup>3</sup> Marker amplification: “++” – strong amplification, “-” – weak or no amplification.
