# Supplementary material for: Molecular Characterization of the Dwarf53 Gene Homolog in Dasypyrum Villosum
Source: MDPI journal article supplement (doi:10.3390/plants9020186), 2020-02-03
Supplement: s1 [file s1]

```

                *          20          *          40          *          60          *          80          *
TaD53-5A : CGCAGGCCCGCCTGTGTTAAATACATGGATAATTTGATCTCATTTGGTATAAAAGG GTGCAGTTTTTCTTCAGTGCAGG TAGAGATGATCAG : 94
TaD53-5B : TGCATGCTCAGCCTGTGTTAAATACATGGATAATTTGATCTCATTTGGTATAAAAATCGTGCAGTTTTTCTTCAGTGCAGG TAGAGATGATCAG : 93
TaD53-5D : CGCAGGCCCGCCTGTGTTAAATACATGGATAATTTGATCTCATTTGGTATAAAAGTGTGCAGTTTTTCTTCAGTGCAGG TAGAGATGATCAG : 94
W6 19414 a : TGCACGCAACAGCATGTTAAATACATGGATAATTTGATCTCATTTGGTATAAAAATGTGCAGTTTTTCTTCAGTGCAGG TAGAGATGATCAG : 93
W6 19414 b : TGCACGCAACAGCATGTTAAATACATGGATAATTTGATCTCATTTGGTATAAAAATGTGCAGTTTTTCTTCAGTGCAGG TAGAGATGATCAG : 93
W6 7313 a : TGCACGCAACAGCATGTTAAATACATGGATAATTTGATCTCATTTGGTATAAAAATGTGCAGTTTTTCTTCAGTGCAGG TAGAGATGATCAG : 93
W6 7313 b : TGCACGCAACAGCATGTTAAATACATGGATAATTTGATCTCATTTGGTATAAAAATGTGCAGTTTTTCTTCAGTGCAGG TAGAGATGATCAG : 93
W6 21717 a : TGCACGCAACAGCATGTTAAATACATGGATAATTTGATCTCATTTGGTATAAAAATGTGCAGTTTTTCTTCAGTGCAGG TAGAGATGATCAG : 93
W6 21717 b : TGCACGCAACAGCATGTTAAATACATGGATAATTTGATCTCATTTGGTATAAAAATGTGCAGTTTTTCTTCAGTGCAGG TAGAGATGATCAG : 93
PI 598390 a : TGCACGCAACAGCATGTTAAATACATGGATAATTTGATCTCATTTGGTATAAAAATGTGCAGTTTTTCTTCAGTGCAGG TAGAGATGATCAG : 93
PI 598390 b : TGCACGCAACAGCATGTTAAATACATGGATAATTTGATCTCATTTGGTATAAAAATGTGCAGTTTTTCTTCAGTGCAGG TAGAGATGATCAG : 93
PI 470279 a : TGCACGCAACAGCATGTTAAATACATGGATAATTTGATCTCATTTGGTATAAAAATGTGCAGTTTTTCTTCAGTGCAGG TAGAGATGATCAG : 93
PI 470279 b : TGCACGCAACAGCATGTTAAATACATGGATAATTTGATCTCATTTGGTATAAAAATGTGCAGTTTTTCTTCAGTGCAGG TAGAGATGATCAG : 93
Sicily #3 a : TGCACGCAACAGCATGTTAAATACATGGATAATTTGATCTCATTTGGTATAAAAATGTGCAGTTTTTCTTCAGTGCAGG TAGAGATGATCAG : 93
Sicily #3 b : TGCACGCAACAGCATGTTAAATACATGGATAATTTGATCTCATTTGGTATAAAAATGTGCAGTTTTTCTTCAGTGCAGG TAGAGATGATCAG : 93

                100          *          120          *          140          *          160          *          180
TaD53-5A : ATGTTGTTGAAATCAAAAATATTGAATCTCAGAGAAGTGGAAACGAGTACTGCCTGCGGCTCCACCAAGGAGCCAGAGGATCAACACAGGT : 187
TaD53-5B : ATGTTGTTGAAATCAAAAATATTGAATCTCAGAGAAGTGGAAACGAGTACTGCCTGCGGCTCCACCAAGGAGCCAGAGGATCAACACAGGT : 186
TaD53-5D : ATGTTGTTGAAATCAAAAATATTGAATCTCAGAGAAGTGGAAACGAGTACTGCCTGCGGCTCCACCAAGGAGCCAGAGGATCAACACAGGT : 187
W6 19414 a : ATGTTGTTGAAATCAAAAATATTGAATCTCAGAGAAGTGGAAACGAGTACTGCCTGCGGCTCCACCAAGGAGCCAGAGGATCAACACAGGT : 186
W6 19414 b : ATGTTGTTGAAATCAAAAATATTGAATCTCAGAGAAGTGGAAACGAGTACTGCCTGCGGCTCCACCAAGGAGCCAGAGGATCAACACAGGT : 186
W6 7313 a : ATGTTGTTGAAATCAAAAATATTGAATCTCAGAGAAGTGGAAACGAGTACTGCCTGCGGCTCCACCAAGGAGCCAGAGGATCAACACAGGT : 186
W6 7313 b : ATGTTGTTGAAATCAAAAATATTGAATCTCAGAGAAGTGGAAACGAGTACTGCCTGCGGCTCCACCAAGGAGCCAGAGGATCAACACAGGT : 186
W6 21717 a : ATGTTGTTGAAATCAAAAATATTGAATCTCAGAGAAGTGGAAACGAGTACTGCCTGCGGCTCCACCAAGGAGCCAGAGGATCAACACAGGT : 186
W6 21717 b : ATGTTGTTGAAATCAAAAATATTGAATCTCAGAGAAGTGGAAACGAGTACTGCCTGCGGCTCCACCAAGGAGCCAGAGGATCAACACAGGT : 186
PI 598390 a : ATGTTGTTGAAATCAAAAATATTGAATCTCAGAGAAGTGGAAACGAGTACTGCCTGCGGCTCCACCAAGGAGCCAGAGGATCAACACAGGT : 186
PI 598390 b : ATGTTGTTGAAATCAAAAATATTGAATCTCAGAGAAGTGGAAACGAGTACTGCCTGCGGCTCCACCAAGGAGCCAGAGGATCAACACAGGT : 186
PI 470279 a : ATGTTGTTGAAATCAAAAATATTGAATCTCAGAGAAGTGGAAACGAGTACTGCCTGCGGCTCCACCAAGGAGCCAGAGGATCAACACAGGT : 186
PI 470279 b : ATGTTGTTGAAATCAAAAATATTGAATCTCAGAGAAGTGGAAACGAGTACTGCCTGCGGCTCCACCAAGGAGCCAGAGGATCAACACAGGT : 186
Sicily #3 a : ATGTTGTTGAAATCAAAAATATTGAATCTCAGAGAAGTGGAAACGAGTACTGCCTGCGGCTCCACCAAGGAGCCAGAGGATCAACACAGGT : 186
Sicily #3 b : ATGTTGTTGAAATCAAAAATATTGAATCTCAGAGAAGTGGAAACGAGTACTGCCTGCGGCTCCACCAAGGAGCCAGAGGATCAACACAGGT : 186

```

**Figure S1.** A part of the alignment of the *D53* genes of common wheat (*TaD53-5A*, *TaD53-5B*, *TaD53-5D*) and *D. villosum* (accession numbers are indicated). The PCR primers DvD53-F and DvD53-R selected for the regions of the *D53* gene differing between wheat and *D. villosum* are highlighted in green.
